# Supplementary material
Source: MDPI journal article supplement (https://www.mdpi.com/2072-4292/13/20/4059)
Supplement: s1 [file s1]

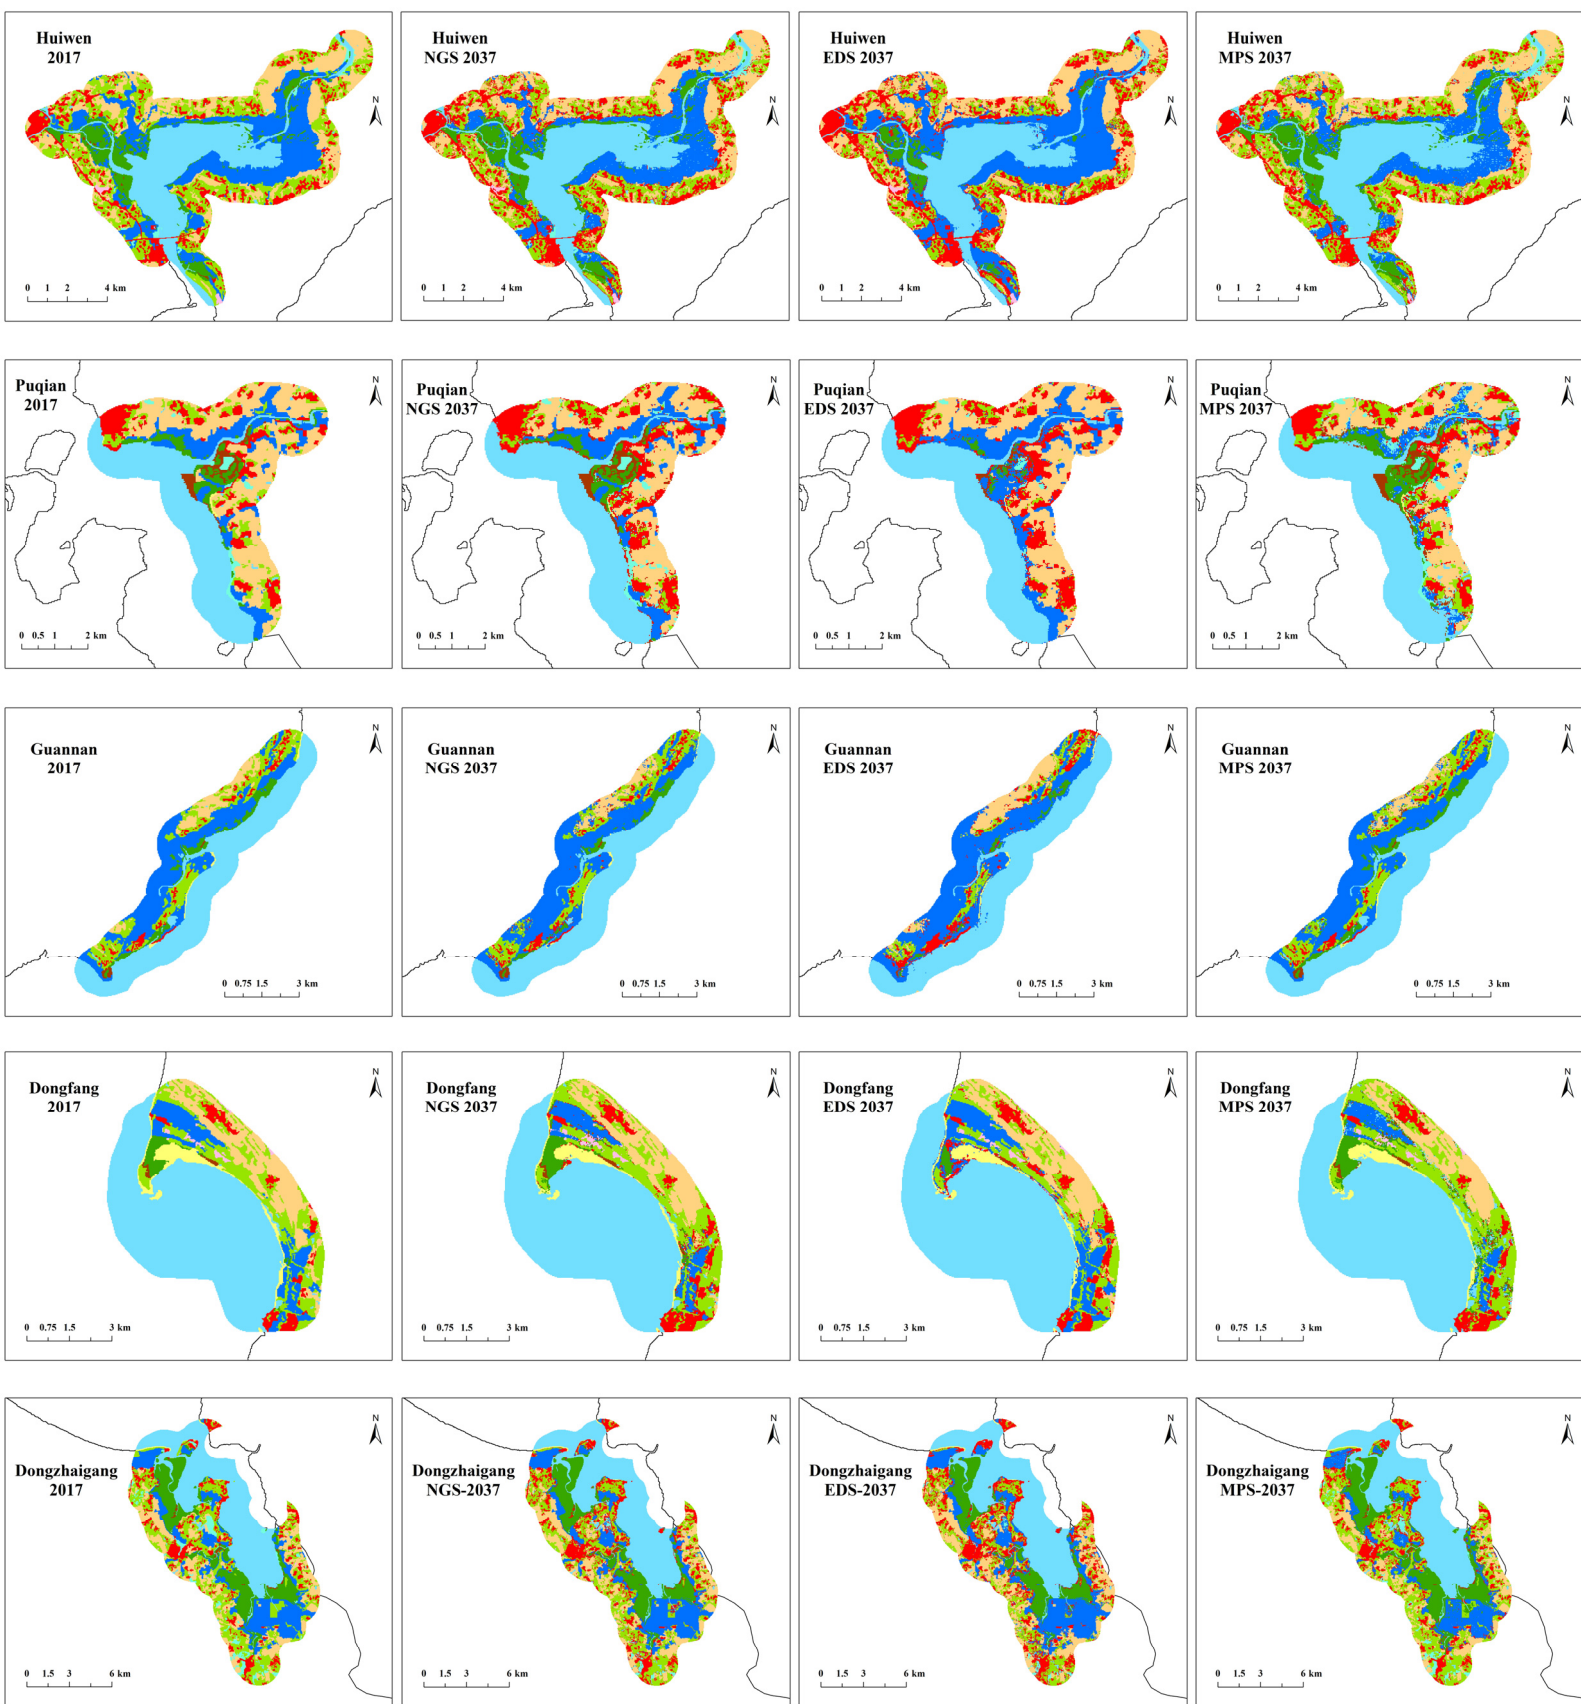

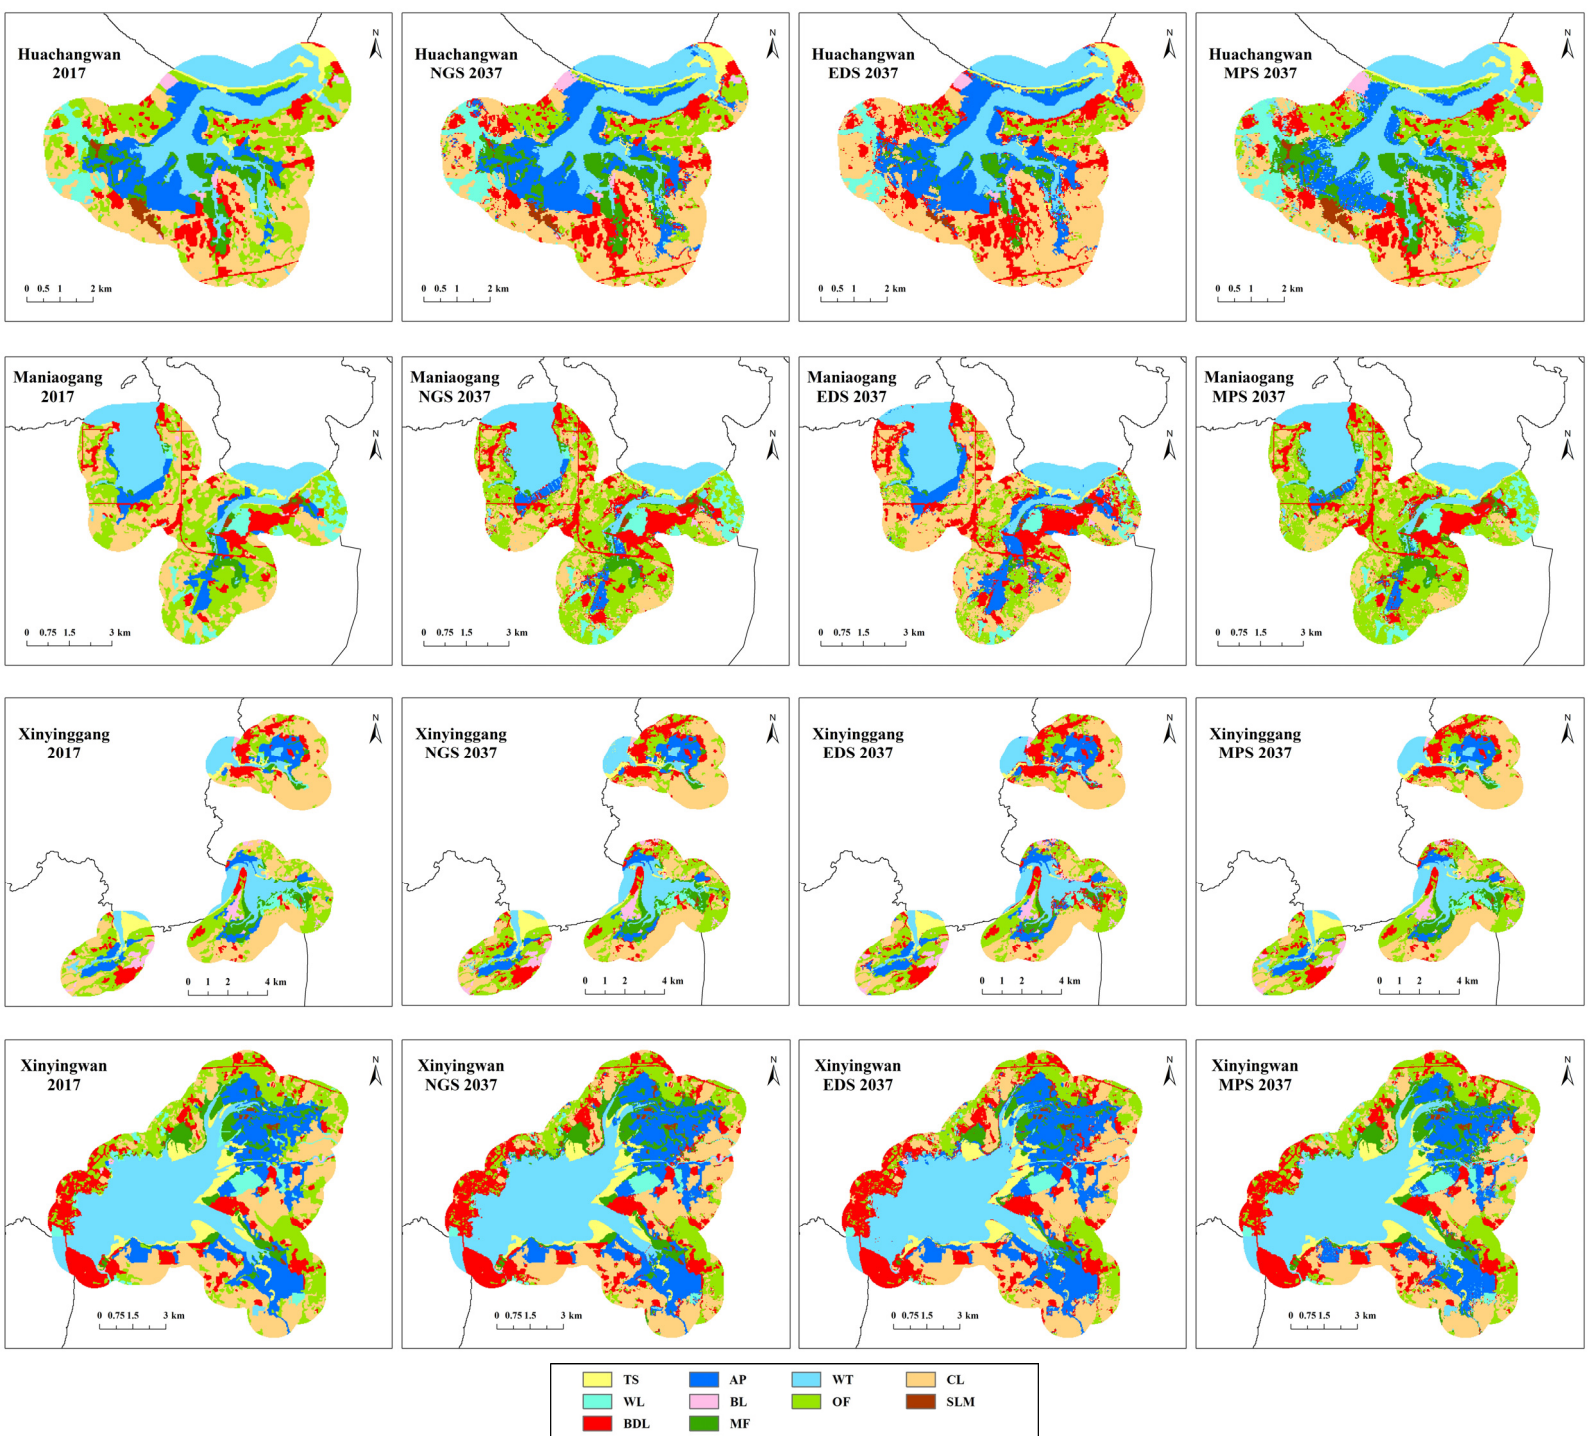

**Figure S1.** Comparison between the observation maps for 2017 and the simulation maps for 2037 under different scenarios.

**Table S1.** The details of the selected reserves in this study.

| Site         | Year    | Aear (ha) | Level      |
|--------------|---------|-----------|------------|
| Qinglangang  | 1981.09 | 2948      | Provincial |
| Dongfang     | 2006.05 | 1429      | Provincial |
| Dongzhaigang | 1980.04 | 3337      | National   |
| Huachangwan  | 1995.12 | 150       | Local      |
| Maniaogang   | 1992.04 | 696       | Local      |
| Xinyinggang  | 1986.12 | 350       | Local      |
| Xinyingwan   | 1992.04 | 115       | Local      |

**Table S2.** The conversion sequence under different scenarios.

| Scenario | Class | TS | AP | WT | CL | WL | BL | MF | OF | SLM | BDL |
|----------|-------|----|----|----|----|----|----|----|----|-----|-----|
| NGS      | TS    | 1  | 1  | 1  | 1  | 1  | 1  | 1  | 1  | 1   | 1   |
|          | AP    | 1  | 1  | 1  | 1  | 1  | 1  | 1  | 1  | 1   | 1   |
|          | WT    | 1  | 1  | 1  | 1  | 1  | 1  | 1  | 1  | 1   | 1   |
|          | CL    | 1  | 1  | 1  | 1  | 1  | 1  | 1  | 1  | 1   | 1   |
|          | WL    | 1  | 1  | 1  | 1  | 1  | 1  | 1  | 1  | 1   | 1   |
|          | BL    | 1  | 1  | 1  | 1  | 1  | 1  | 1  | 1  | 0   | 1   |
|          | MF    | 1  | 1  | 1  | 1  | 1  | 1  | 1  | 1  | 1   | 1   |
|          | OF    | 1  | 1  | 1  | 1  | 1  | 1  | 1  | 1  | 1   | 1   |
|          | SLM   | 1  | 1  | 1  | 1  | 1  | 0  | 1  | 1  | 1   | 1   |
|          | BDL   | 0  | 1  | 0  | 1  | 1  | 1  | 0  | 1  | 0   | 1   |
| EDS      | TS    | 1  | 1  | 1  | 1  | 1  | 1  | 1  | 1  | 1   | 1   |
|          | AP    | 0  | 1  | 0  | 1  | 0  | 0  | 0  | 0  | 0   | 1   |
|          | WT    | 1  | 1  | 1  | 1  | 1  | 1  | 1  | 1  | 1   | 1   |
|          | CL    | 1  | 1  | 1  | 1  | 1  | 1  | 1  | 1  | 1   | 1   |
|          | WL    | 1  | 1  | 1  | 1  | 1  | 1  | 1  | 1  | 1   | 1   |
|          | BL    | 1  | 1  | 1  | 1  | 1  | 1  | 1  | 1  | 0   | 1   |
|          | MF    | 1  | 1  | 1  | 1  | 1  | 1  | 1  | 1  | 1   | 1   |
|          | OF    | 1  | 1  | 1  | 1  | 1  | 1  | 1  | 1  | 1   | 1   |
|          | SLM   | 1  | 1  | 1  | 1  | 1  | 0  | 1  | 1  | 1   | 1   |
|          | BDL   | 0  | 1  | 0  | 1  | 0  | 0  | 0  | 0  | 0   | 1   |
| MPS      | TS    | 1  | 1  | 1  | 1  | 1  | 1  | 1  | 1  | 1   | 1   |
|          | AP    | 1  | 1  | 1  | 1  | 1  | 1  | 1  | 1  | 1   | 1   |
|          | WT    | 1  | 1  | 1  | 1  | 1  | 1  | 1  | 1  | 1   | 1   |
|          | CL    | 1  | 1  | 1  | 1  | 1  | 1  | 1  | 1  | 1   | 1   |
|          | WL    | 1  | 1  | 1  | 1  | 1  | 1  | 1  | 1  | 1   | 1   |
|          | BL    | 1  | 1  | 1  | 1  | 1  | 1  | 1  | 1  | 0   | 1   |
|          | MF    | 1  | 0  | 1  | 0  | 1  | 1  | 1  | 1  | 1   | 0   |
|          | OF    | 1  | 1  | 1  | 1  | 1  | 1  | 1  | 1  | 1   | 1   |
|          | SLM   | 1  | 1  | 1  | 1  | 1  | 0  | 1  | 1  | 1   | 1   |
|          | BDL   | 0  | 1  | 0  | 1  | 1  | 1  | 0  | 1  | 0   | 1   |

**Table S3.** The conversion elasticity under different scenarios.

| Scenario | TS   | AP   | WT  | CL   | WL   | BL   | MF   | OF   | SLM  | BDL  |
|----------|------|------|-----|------|------|------|------|------|------|------|
| NGS      | 0.35 | 0.6  | 0.9 | 0.45 | 0.35 | 0.35 | 0.8  | 0.45 | 0.35 | 0.9  |
| EDS      | 0.35 | 0.9  | 0.9 | 0.45 | 0.35 | 0.35 | 0.35 | 0.45 | 0.35 | 0.9  |
| MPS      | 0.35 | 0.35 | 0.9 | 0.45 | 0.35 | 0.35 | 0.9  | 0.45 | 0.35 | 0.35 |

**Table S4.** The annual area changes under different scenarios (pixel/y).

| Site         | Scenario | TS  | AP   | WT   | CL   | WL   | BL  | MF   | OF   | SLM | BDL |
|--------------|----------|-----|------|------|------|------|-----|------|------|-----|-----|
| Huiwen       | NGS      | 0   | -130 | 70   | -40  | 50   | -5  | 10   | -310 | 5   | 350 |
|              | EDS      | 0   | 350  | -80  | 40   | -25  | -2  | -280 | -500 | -3  | 500 |
|              | MPS      | 0   | -260 | 150  | -80  | 75   | -15 | 80   | -210 | 10  | 250 |
| Dongfang     | NGS      | -18 | -70  | 3    | -54  | 0    | 10  | 27   | 27   | 10  | 65  |
|              | EDS      | -18 | 60   | -20  | -26  | 0    | 6   | -27  | -50  | -5  | 80  |
|              | MPS      | -18 | -90  | 46   | -100 | 0    | 6   | 68   | 29   | 20  | 39  |
| Dongzhiagang | NGS      | 1   | 68   | 4    | -42  | -110 | -1  | -75  | -133 | -13 | 301 |
|              | EDS      | 1   | 215  | 4    | 105  | -124 | -1  | -153 | -500 | -27 | 480 |
|              | MPS      | 1   | -185 | 24   | -191 | -50  | -1  | 141  | 46   | 15  | 200 |
| Guannan      | NGS      | 0   | 86   | -9   | -26  | 0    | 0   | -30  | -50  | 9   | 20  |
|              | EDS      | 0   | 160  | -50  | 50   | 0    | 0   | -53  | -162 | -5  | 60  |
|              | MPS      | 0   | 34   | 9    | -50  | 0    | 0   | 17   | -35  | 15  | 10  |
| Huachangwan  | NGS      | 5   | 98   | -63  | 14   | 5    | 10  | 34   | -194 | -12 | 103 |
|              | EDS      | 5   | 133  | -60  | 158  | -20  | -2  | -80  | -284 | -20 | 170 |
|              | MPS      | 5   | -90  | 102  | -72  | 20   | 10  | 90   | -147 | 12  | 70  |
| Maniao       | NGS      | -1  | -77  | 15   | -190 | 5    | 14  | 20   | 55   | 11  | 148 |
|              | EDS      | -1  | 95   | -30  | 100  | -60  | 20  | -35  | -280 | -5  | 196 |
|              | MPS      | 1   | -100 | 20   | -270 | 10   | -3  | 40   | 201  | 22  | 79  |
| Puqian       | NGS      | -1  | 5    | -22  | -66  | 27   | 0   | -7   | -43  | 17  | 90  |
|              | EDS      | -1  | 90   | -17  | -19  | -10  | 0   | -60  | -73  | -20 | 110 |
|              | MPS      | 0   | -100 | 52   | -112 | 40   | 0   | 31   | 10   | 34  | 45  |
| Xinying      | NGS      | 36  | -8   | -39  | -211 | -15  | 20  | 24   | 40   | 10  | 143 |
|              | EDS      | -10 | 100  | -50  | -168 | -30  | 20  | -85  | 30   | -2  | 195 |
|              | MPS      | 20  | -40  | 19   | -236 | 0    | 20  | 42   | 50   | 20  | 105 |
| Xinyingwan   | NGS      | -6  | 70   | -72  | 80   | -53  | 1   | 99   | -350 | 8   | 223 |
|              | EDS      | -6  | 200  | -100 | 194  | -75  | 1   | -98  | -408 | -8  | 300 |
|              | MPS      | -6  | -148 | 120  | -17  | -36  | 1   | 150  | -226 | 12  | 150 |
